# 1 Design and optimization of a cell-free atrazine biosensor

2 Adam D. Silverman<sup>1,2,3</sup>, Umut Akova<sup>1,3</sup>, Khalid K. Alam<sup>1,3</sup>, Michael C. Jewett<sup>1,2,3,4,5,6\*</sup>, Julius B.  
3 Lucks<sup>1,2,3,4,7,\*</sup>

4  
5 <sup>1</sup>Department of Chemical and Biological Engineering, <sup>2</sup>Chemistry of Life Processes Institute,  
6 <sup>3</sup>Center for Synthetic Biology, Northwestern University, Evanston, IL 60208, USA,  
7 <sup>4</sup>Interdisciplinary Biological Sciences Program, Northwestern University, Evanston, IL 60208,  
8 <sup>5</sup>Member, Robert H. Lurie Comprehensive Cancer Center, <sup>6</sup>Member, Simpson Querrey Institute,  
9 Northwestern University, Chicago, IL 60611, USA, <sup>7</sup>Center for Water Research, Northwestern  
10 University, Evanston, IL 60208, USA

11 \* To whom correspondence should be addressed: [m-jewett@northwestern.edu](mailto:m-jewett@northwestern.edu),  
12 [jblucks@northwestern.edu](mailto:jblucks@northwestern.edu)

## 14 ABSTRACT

15 Recent advances in cell-free synthetic biology have spurred the development of *in vitro*  
16 molecular diagnostics that serve as effective alternatives to whole-cell biosensors. However,  
17 cell-free sensors for detecting manmade organic water contaminants such as pesticides are  
18 sparse, partially because few characterized natural biological sensors can directly detect such  
19 pollutants. Here, we present a platform for the cell-free detection of one critical water  
20 contaminant, atrazine, by combining a previously characterized cyanuric acid biosensor with a  
21 reconstituted atrazine-to-cyanuric acid metabolic pathway composed of several protein-enriched  
22 bacterial extracts mixed in a one pot reaction. Our cell-free sensor detects atrazine within an  
23 hour of incubation at an activation ratio superior to previously reported whole-cell atrazine  
24 sensors. We also show that the response characteristics of the atrazine sensor can be tuned by  
25 manipulating the component ratios of the cell-free reaction mixture. Our approach of utilizing  
26 multiple metabolic steps, encoded in protein-enriched cell-free extracts, to convert a target of  
27 interest into a molecule that can be sensed by a transcription factor is modularly designed,  
28 which should enable this work to serve as an effective proof-of-concept for rapid field-  
29 deployable detection of complex organic water contaminants.

## 31 KEYWORDS

32 cell-free, TX-TL, metabolism, transcription factor, biosensor, atrazine, cyanuric acid, synthetic  
33 biology

## 35 INTRODUCTION

36 Cell-free gene expression (CFE) has recently emerged as a powerful strategy for rapid,  
37 field-deployable diagnostics for nucleic acids<sup>1-5</sup> and chemical contaminants.<sup>6-9</sup> One reason for  
38 this success is that CFE reactions minimize many of the constraints of whole-cell sensors,  
39 including mass transfer barriers, cytotoxicity, genetic instability, plasmid loss, and the need for  
40 biocontainment.<sup>8,10</sup> In addition, CFE reactions can be stabilized through freeze-drying and then  
41 are activated upon rehydration, enabling the biosensors to be used outside the laboratory at the  
42 point of sampling in the field.<sup>1</sup> However, previously reported cell-free biosensors have so far  
43 been limited to detecting either nucleic acids<sup>2,3</sup> or chemical contaminants that can be directly  
44 sensed with well-characterized allosteric protein transcription factors or riboswitches.<sup>8,9,11-13</sup>

45 Here, we expand the ability of cell-free biosensors to detect complex organic molecules  
46 by developing a combined metabolism and biosensing strategy. Our strategy is motivated by the  
47 observation that the space of known natural transcription factors may be insufficient to directly  
48 detect organic molecules of analytical interest, especially those that are man-made and  
49 relatively new to natural environments. On the other hand, a wealth of metabolic biochemistry  
50 often exists that could convert a target molecule of interest into a compound that can be directly  
51 sensed by a transcription factor. Thus, a range of new CFE-based diagnostics could be  
52 developed by combining *in vitro* metabolic conversion with natural transcriptional biosensors.  
53 Recently, such a strategy was validated in CFE reactions using a simple one-enzyme pathway  
54 where the enzyme, transcription factor, and reporter are encoded on separate plasmids. In that  
55 work, cocaine and hippuric acid were catabolized *in vitro* to make benzoic acid, which is sensed  
56 by the allosteric transcription factor BenR.<sup>7,14,15</sup> However, the metabolic pathways tested were  
57 short – containing only a single enzyme – and converged to a simple and abundant analyte  
58 detected by a native *E. coli* transcription factor. A more general approach would be necessary  
59 for detecting xenobiotic, or new-to-nature, analytes.

60 Specifically, in this study, we develop a strategy for multi-enzymatic metabolic  
61 biosensing of atrazine—one of the most commonly detected herbicides in American surface  
62 water, and a suspected endocrine-disrupting compound.<sup>16</sup> Atrazine is frequently measured in  
63 finished water sources at concentrations above the recommended 3 parts per billion (ppb)  
64 Maximum Containment Level Goal (MCLG) set by the United States Environmental Protection  
65 Agency (EPA).<sup>17,18</sup> The pesticide has been reported to cause severe health risks when  
66 consumed by children, making it an important target molecule for this work.<sup>17-19</sup>

67 This work builds off of our recent report demonstrating the ability of the LysR-type  
68 transcriptional regulator (LTTR) AtzR to detect its cognate ligand, cyanuric acid (CYA), using *in*  
69 *vitro* CFE reactions.<sup>20</sup> When freeze-dried, the CYA sensor activated only when rehydrated with  
70 unfiltered pool water samples containing high (hundreds of micromolar) concentrations of CYA.  
71 Here, we combine that CYA cell-free sensor with a reconstituted cell-free metabolic pathway  
72 that converts atrazine to CYA through three steps in a single pot reaction. Due to the burden  
73 imposed by synthesizing several proteins *in situ* in a single batch CFE reaction, we developed  
74 an extract mixing strategy, where individual extracts enriched with a single enzyme or  
75 transcription factor are combined to reconstitute the complete biosensing reaction. This modular  
76 approach allows the system to be optimized by simply searching over the ratios of each distinct  
77 enriched extract. Using this approach, we developed a sensor capable of discriminating high  
78 concentrations of atrazine (10-100  $\mu$ M) within an hour of incubation. We anticipate that our  
79 combined metabolism and biosensing strategy for detecting atrazine will be broadly applicable  
80 for the rapid cell-free detection of pesticides and other water contaminants, as well as  
81 environmental biomarkers and human performance analytes.

82  
83

## 84 RESULTS

85

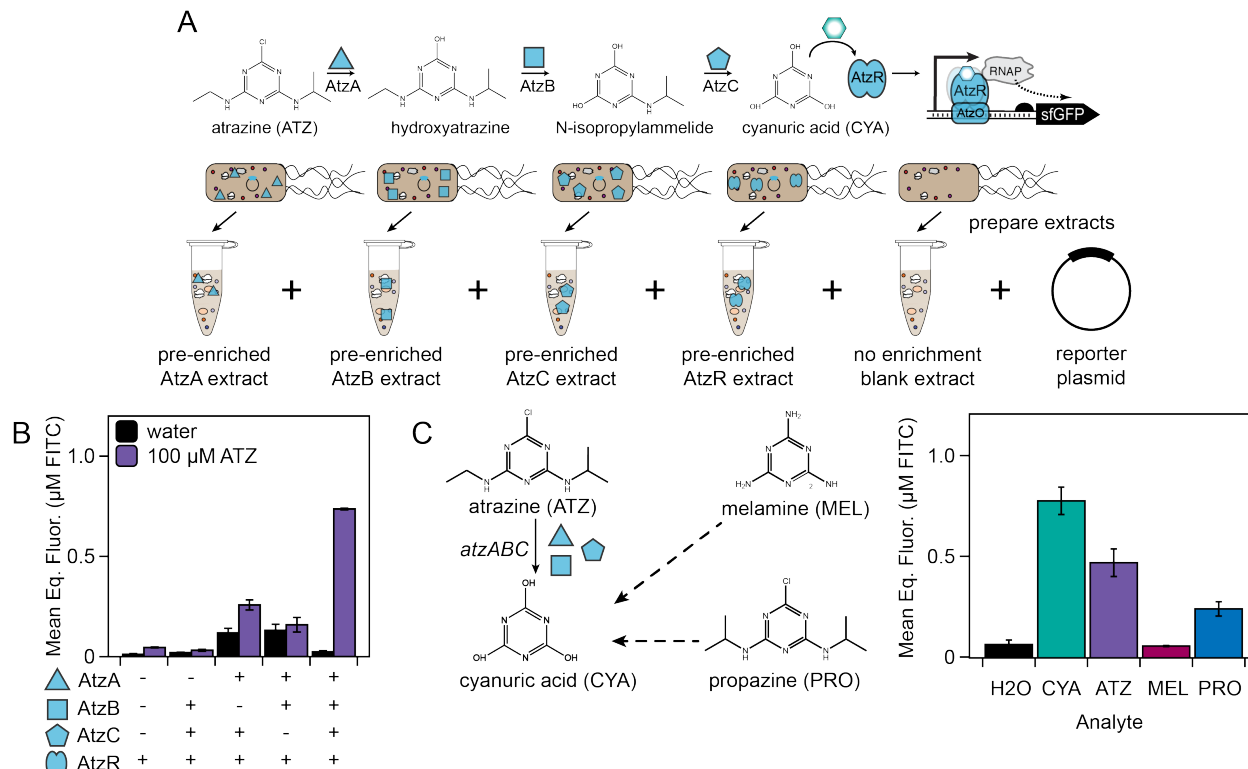

86

87 **Figure 1. Design of a cell-free atrazine biosensor.** (A) Atrazine is catabolized by a three-enzyme  
 88 pathway into cyanuric acid, which can activate transcription through the AtzR transcription factor which  
 89 recognizes an operator sequence within an engineered promoter. The four required proteins (three  
 90 enzymes AtzA, AtzB, AtzC and the transcription factor AtzR) are separately overexpressed in strains of  
 91 BL21 *E. coli*, then lysed and prepared into individual extracts, which can be mixed in fixed ratios to  
 92 optimize detection of atrazine. (B) Cell-free detection of atrazine requires the presence of all three  
 93 pathway enzymes. (C) The sensor is capable of detecting cyanuric acid and atrazine, as well as  
 94 propazine, a triazine of similar chemical structure, but discriminates against melamine. CYA = cyanuric  
 95 acid; ATZ = atrazine; MEL = melamine; PRO = propazine. All reactions include 10 nM of a fluorescent  
 96 reporter DNA template. Error bars represent the standard deviation of sGFP fluorescence measurements  
 97 from three technical replicates, correlated to a known linear fluorescein isothiocyanate (FITC) standard.

98

99 To design our cell-free atrazine sensor, we took inspiration from *Pseudomonas* sp. strain  
 100 ADP-1, which metabolizes atrazine into cyanuric acid through a three-enzyme pathway encoded  
 101 on the *atzABC* operon (Figure 1A).<sup>21,22</sup> We hypothesized that by co-expressing each of these  
 102 enzymes, as well as the cyanuric acid-inducible transcription factor (AtzR) and a fluorescent  
 103 reporter construct we had previously engineered<sup>20</sup>, we would observe atrazine-inducible  
 104 reporter protein synthesis. However, co-expressing five different proteins would likely diminish  
 105 reporter titer and delay the response time for the sensor, even if cell-free expression of each  
 106 protein were feasible. Instead, we pre-enriched four separate extracts (one each with AtzA,  
 107 AtzB, AtzC, and AtzR) by inducing protein overexpression from the *E. coli* host strain before  
 108 lysing the cells and preparing individual extracts. This approach, based on previous work for use  
 109 in cell-free metabolic engineering,<sup>23</sup> greatly simplifies the overall sensor design and optimization  
 110 since the load of each enzyme in the final cell-free reaction can be controlled by adjusting the

111 fraction of its pre-enriched extract in the final mixture. We prepared all of the extracts using  
112 methods that maximize gene expression from the endogenous *E. coli* transcriptional  
113 machinery.<sup>24</sup>

114 By mixing all of these protein-enriched extracts together with a “blank” extract that was  
115 not pre-enriched with any protein, as well as a reporter plasmid encoding superfolder green  
116 fluorescent protein (sfGFP) under regulation by an engineered ADP-1 *atzR* promoter, we could  
117 detect atrazine doped into a cell-free reaction at 100  $\mu$ M (**Figure 1B**), the stoichiometric  
118 equivalent of the concentration of cyanuric acid that saturated AtzR activation in our previous  
119 work.<sup>20</sup> As expected, if any of the individual enzyme-enriched extracts was left out of the  
120 reaction and replaced with a blank, unenriched extract, the sensor could not effectively detect  
121 atrazine above a control reaction supplemented only with water (**Figure 1B**). To the best of our  
122 knowledge, this result is the most complex demonstration to date for coupling an upstream  
123 metabolic module to an inducible transcriptional biosensor, either in cells or in cell-free systems.

124 To investigate the sensor’s specificity, we challenged the reaction with two other  
125 environmentally relevant triazines that had negligible inhibitory effects on unregulated cell-free  
126 transcription and translation reactions (**Supplementary Figure S1**): melamine and propazine.  
127 When the biosensor was challenged with each of these compounds, we observed weak  
128 activation only in response to propazine, which has a more similar chemical structure to atrazine  
129 than melamine (**Figure 1C**). This result is consistent with previous observations that ADP-1’s  
130 atrazine chlorohydrolase, AtzA, which actually evolved from the melamine deaminase TriA in  
131 the twentieth century, no longer shows any activity on melamine.<sup>25,26</sup>

132 Satisfied that our cell-free sensor, composed of four different protein-enriched *E. coli*  
133 extracts and a blank extract, could detect saturating levels of atrazine, we next aimed to  
134 optimize its sensitivity. In the previous mix-and-match approach (**Figure 1B**), we observed a  
135 large amount of variability in the negative (water) controls over different extract combinations.  
136 This disparity is likely caused both by general batch-to-batch inconsistencies between the  
137 extracts<sup>27</sup>, and enzyme-specific poisoning effects, where expression of toxic proteins impacts  
138 cell growth and results in poorly performing extracts. To this second point, we found that the  
139 protein-enriched extracts were generally less productive than the unenriched extract in a control  
140 reaction expressing unregulated sfGFP (**Supplementary Figure S2**). The AtzB and AtzR-  
141 enriched extracts, which were prepared from highly growth-inhibited strains, could not support  
142 any measurable sfGFP synthesis on their own. However, because of the open reaction  
143 environment of the cell-free reaction, we could iteratively adjust enzyme and transcription factor  
144 levels by mixing different ratios of the four enriched extracts. To “buffer” the mixed extract  
145 against toxicity effects, we made up the rest of the reaction volume with the blank unenriched  
146 extract, with the aim of increasing overall reporter protein synthesis yield.

147  
148

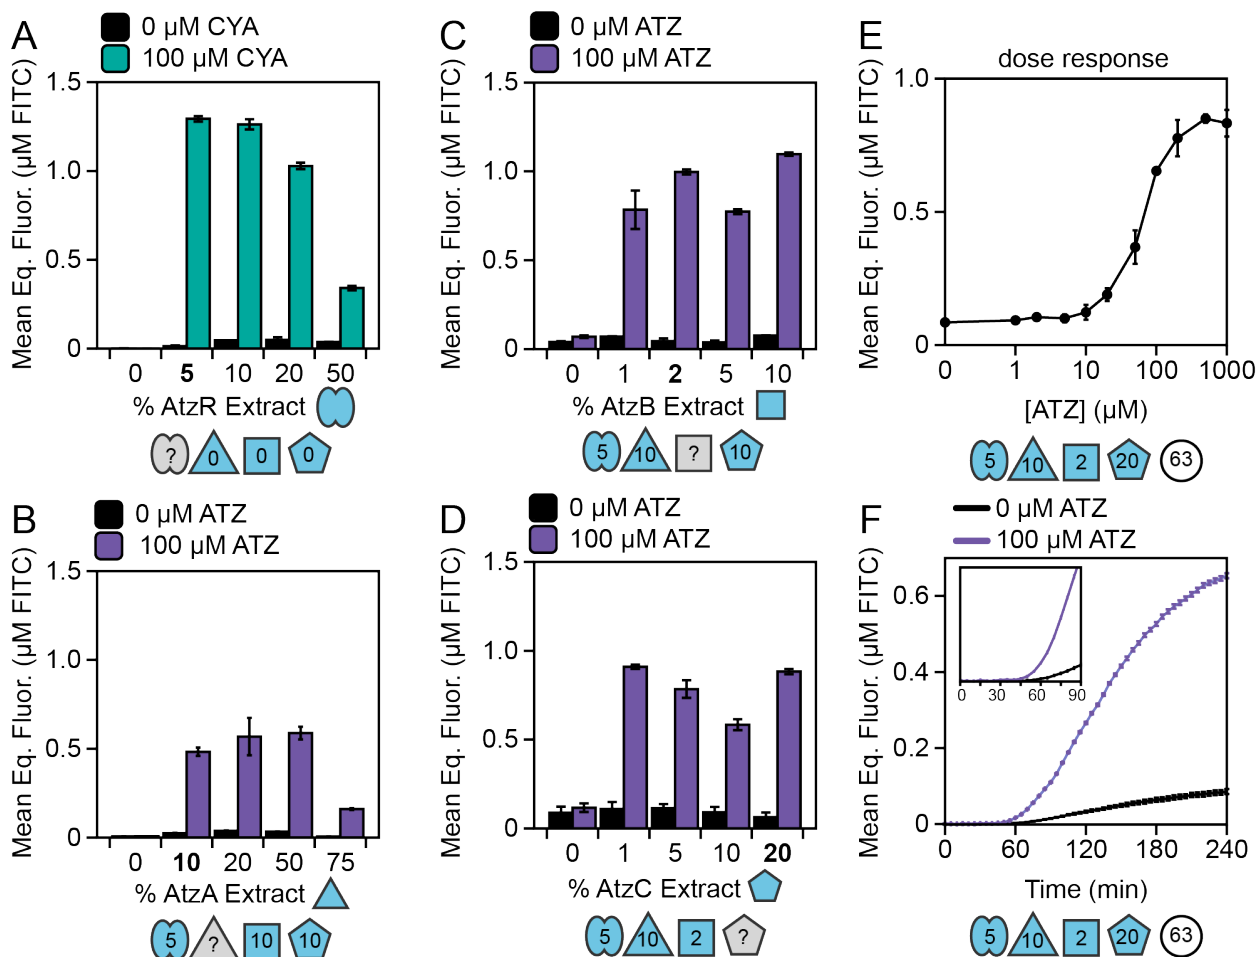

149  
150

151 **Figure 2. Optimization of the cell-free atrazine sensor.** (A-D) Iterative optimization of the ratios of the  
 152 AtzR, AtzA, AtzB, and AtzC extracts in the final sensor mixture reveals that the optimal fold induction is  
 153 achieved at 5% AtzR-enriched, 10% AtzA-enriched, 2% AtzB-enriched, 20% AtzC-enriched, and 63%  
 154 unenriched. Symbols below each plot denote the percentage of AtzR (bilobe), AtzA (triangle), AtzB  
 155 (square), AtzC (pentagon), and blank (circle) extracts included in each experiment. Blank extract was  
 156 added to make 100% in each condition. Each reaction contained 10 nM of the reporter DNA template  
 157 from **Figure 1**. (E) Atrazine dose-response curve for the optimized sensor, measured by taking defined  
 158 endpoint samples from biosensor reactions containing the indicated amounts of atrazine, suggests that  
 159 the overall limit of detection is around 20 µM, which is consistent with previous results reported for the  
 160 cell-free cyanuric acid sensor.<sup>20</sup> (F) sfGFP fluorescence can distinguish the ON from OFF state within one  
 161 hour in the presence of 100 µM atrazine, and at endpoint achieves approximately 7-fold induction. Error  
 162 bars represent the standard deviation of sfGFP fluorescence measurements from three technical  
 163 replicates, correlated to a known linear FITC standard.

164

165 We then aimed to identify the ratio of AtzA:-AtzB:-AtzC:-AtzR-enriched:unenriched  
 166 extracts that gave the highest fold induction (defined as fluorescence in the presence of 100 µM  
 167 atrazine / fluorescence in the absence of atrazine) for the sensor. We first determined the  
 168 optimal fraction of the transcription factor AtzR in the sensing reaction by only detecting the  
 169 downstream analyte, cyanuric acid. The greatest fold induction was observed at a 5% AtzR-  
 170 enriched extract and 95% unenriched extract, a ratio that minimizes leak and maximizes ON  
 171 state, likely because that mixture also has the greatest amount of the unenriched extract



172 **(Figure 2A)**. Next, we iteratively optimized the ratios of AtzA-, AtzB-, and AtzC-enriched  
173 extracts in the reaction, starting from an assumption of 10% dosage for each sensor **(Figure**  
174 **2B-D)**. Surprisingly, we observed low sensitivity of the atrazine response to perturbations in the  
175 concentrations of these enzyme-enriched extracts, at least in the range of 1-10% of the total  
176 extract composition. As before, though, no response to atrazine could be observed if any of the  
177 enzyme-enriched extracts was individually left out. At each condition, we chose the extract ratio  
178 that gave the highest fold induction. Using this iterative, coarse-grained optimization, we  
179 obtained an optimal response at 5% AtzR, 10% AtzA, 2% AtzB, and 20% AtzC-enriched  
180 extracts, with the balance (63%) made up by the unenriched extract.

181 Having established an optimal ratio of each extract in our sensor, we measured its dose  
182 response to atrazine by the observed sfGFP fluorescence after 4 hours of reaction **(Figure 2E)**.  
183 The calculated limit of detection, defined as the concentration of atrazine that yielded a  
184 statistically significant detectable signal above background, was approximately 20  $\mu\text{M}$  atrazine  
185 ( $p = 0.01$ , one-tailed t-test), and the half-maximal signal was observed at around 54  $\mu\text{M}$  by  
186 logistic regression. Although these concentrations are far from the stringent limit on atrazine in  
187 drinking water set by the EPA, they do approach some of the highest concentrations of atrazine  
188 previously detected in raw water (237 ppb = 1.1  $\mu\text{M}$ ).<sup>17</sup> Overall, in response to 100  $\mu\text{M}$  atrazine,  
189 the cell-free sensor achieves approximately 7-fold induction and achieves a detectable signal  
190 over background in approximately one hour **(Figure 2F)**. This work represents an improvement  
191 in speed and dynamic range over the previous state-of-the-art whole-cell atrazine biosensor,  
192 which reported a similar atrazine sensitivity but suffered from high leak and poor signal-to-noise  
193 that would preclude its practical use.<sup>28</sup>

## 194 195 **DISCUSSION**

196 To the best of our knowledge, this work represents the most sensitive genetically  
197 encoded biosensor for atrazine. While the sensor is not as sensitive as the 3 ppb atrazine limit  
198 set by the EPA, it has significant improvements in speed and dynamic range over previous  
199 whole-cell sensors for atrazine.<sup>28</sup> For multistep enzyme pathways, a cell-free sensor has other  
200 practical advantages when compared to a cellular sensor. In particular, we observed severe  
201 growth inhibition when overexpressing AtzB **(Supplementary Figure S2)**, an effect consistent  
202 with previous difficulties in converting a whole-cell cyanuric acid biosensor into one detecting  
203 atrazine.<sup>28</sup> Pre-expressing this protein in a source strain, rather than attempting to make it *in*  
204 *situ*, mitigates these inhibitory effects, especially since the protein expression burden is buffered  
205 by a highly productive unenriched extract. Furthermore, our pre-expression approach shifts cell  
206 extract resources away from enzyme and transcription factor production and toward reporter  
207 synthesis. The resulting higher ON state is another advantage of reconstituting these complex  
208 metabolism-sensing pathways *in vitro*. Finally, we believe that our approach of extract mixing,  
209 where the dosage of each enzyme or transcription factor is proportional to its fractional  
210 composition in the reaction, is an optimal linear tuning strategy, preferable to addressing the  
211 nonlinearities introduced by manipulating promoter strength or plasmid copy number, either in  
212 cells or in extracts.

213 Overall, the quantitative agreement of the atrazine transfer function presented in this  
214 work to the one we previously demonstrated for cyanuric acid<sup>20</sup> suggests that this sensor's limit  
215 of detection (LoD) is likely constrained by AtzR's micromolar affinity for cyanuric acid. A

216 secondary LoD may be set by the similarly low affinity (~50  $\mu$ M) of the native AtzA for atrazine.<sup>29</sup>  
217 To improve sensitivity to discriminate lower, more environmentally relevant concentrations of  
218 atrazine, protein engineering of the transcription factor and enzymes is likely necessary.

219 More broadly, previous efforts to engineer cell-free systems as molecular biosensors  
220 have mainly been limited to well-studied transcriptional regulators like tetracyclines and acyl  
221 homoserine lactones.<sup>30,31</sup> Our strategy of preparing and mixing bacterial extracts pre-enriched  
222 with enzymes and transcription factors should greatly expand the scope of molecules that can  
223 be detected *in vitro*. The approach can be generalized to sensing any organic molecule that is  
224 catabolized, through a pathway of any length, into a metabolite that can be detected by  
225 microbes. Since our extract mixing strategy only requires cell-free expression of a single protein,  
226 the resource limitations of batch cell-free reactions are minimized.<sup>32</sup> Thus, cell-free sensors  
227 could be multiplexed into a single reaction tube, just by mixing in several more enriched extracts  
228 and one new reporter plasmid per sensor.

229 Overall, this work expands upon previous efforts to build cell-free sensors by detecting  
230 an important water contaminant at environmentally relevant levels, and it also proposes a new  
231 generalizable approach for building new, highly modular sensors. We anticipate that this design  
232 will spur further innovation in cell-free biosensing with an aim toward improving global water  
233 security and human health.

234

## 235 **ACKNOWLEDGEMENTS**

236 This work was supported by the Air Force Research Laboratory Center of Excellence for  
237 Advanced Bioprogrammable Nanomaterials (C-ABN) Grant FA8650-15-2-5518 (to M.C.J. and  
238 J.B.L.), the U.S. Defense Advanced Research Projects Agency's (DARPA) Living Foundries  
239 program award HR0011-15-C-0084, the David and Lucile Packard Foundation (to M.C.J.), the  
240 Camille Dreyfus Teacher-Scholar Program (to M.C.J. and J.B.L.), an NSF CAREER Award  
241 (Grant 1452441 to J.B.L.) and Searle Funds at the Chicago Community Trust (to J.B.L.). A.D.S.  
242 was supported in part by the National Institutes of Health Training Grant (T32GM008449)  
243 through Northwestern University's Biotechnology Training Program.

244

## 245 **CONFLICT OF INTEREST**

246 A.D.S., K.K.A., M.J.C. and J.B.L have filed provisional patent applications in the field of cell-free  
247 biosensing. K.K.A. and J.B.L. are founders and have financial interest in Stemloop, Inc. These  
248 latter interests are reviewed and managed by Northwestern University in accordance with their  
249 conflict of interest policies. All other authors declare no conflicts of interest.

250

251

## 252 **MATERIALS AND METHODS**

253

### 254 **Plasmid Construction**

255 The reporter plasmid pJBL7030 and AtzR expression plasmid pJBL7032 were used as  
256 previously reported.<sup>20</sup> The AtzA, AtzB, and AtzC-overexpression plasmids pJBL7034,  
257 pJBL7035, and pJBL7036 were constructed using Gibson assembly into the pJL1 vector using  
258 genes synthesized by Twist Biosciences. All plasmids will be deposited on Addgene with the  
259 following IDs: pJBL7034 (133869); pJBL7035 (133870); pJBL7036 (133881); pJBL7030  
260 (133882); pJBL7032 (133883).

261

### 262 **Cell-Free Extract Preparation**

263 Cell-free extract was prepared according to our previously published method.<sup>24</sup> In general, the  
264 host strain for extract preparation was BL21 (DE3) dLacZ. The *lacZ* deficient (*lac* operon  
265 deletion) BL21-Gold-dLac (DE3) strain was a gift from Jeff Hasty (Addgene plasmid # 99247).<sup>9</sup>  
266 The exception to this was the AtzB-enriched extract; since we could not successfully transform  
267 the purified plasmid into the knockout strain, this extract was instead prepared using the  
268 Rosetta2 (DE3) pLysS strain. For each transformed strain, 1 L culture of 2X YT + P (16 g  
269 tryptone, 10 g yeast extract, 5 g NaCl, 7 g potassium phosphate dibasic, 3 g potassium  
270 phosphate monobasic) was inoculated from a saturated overnight culture of the chassis strain in  
271 LB and grown shaking at 220 RPM at 37°C. For the enzyme- and transcription factor-enriched  
272 extract, protein synthesis was induced by adding IPTG at a concentration of 0.5 mM around  
273 OD<sub>600</sub> 0.5. The cells were harvested mainly at OD<sub>600</sub> 3.0. However, the AtzB and AtzR-enriched  
274 extracts were severely growth-restricted, and the cells were harvested once they reached a  
275 stationary OD<sub>600</sub>, at approximately 1.5 and OD 2.0 respectively. The remainder of the cell-free  
276 preparation followed a published protocol for activating cell-free endogenous transcription,<sup>24</sup>  
277 including an 80-minute runoff reaction and 3-hour dialysis.

278

### 279 **Cell-Free Gene Expression Reaction**

280 Cell-free gene expression reactions were assembled as previously reported from extract, mid-  
281 prepmed plasmid DNA, salts, nucleotide triphosphates, amino acids, phosphoenolpyruvate, and  
282 other cofactors and coenzymes.<sup>24</sup> 8 mM Mg-glutamate salt solution was used for all  
283 experiments. Reactions were assembled in triplicate on ice, and 10 µL of each assembled  
284 reaction was pipetted into an individual well of a 384-well plate (Corning, 3712) and measured  
285 on a BioTek Synergy H1m plate reader. sfGFP fluorescence was measured using emission at  
286 485 nm and excitation at 520 nm. Fluorescence values were correlated to equivalents of  
287 fluorescein isothiocyanate (FITC) using a known standard curve.

288

### 289 **Data Availability**

290 Source data for all figures and the FITC standard curve are available in the Northwestern  
291 University Arch Institutional Repository (doi 10.21985/n2-z5vp-tk94).

292

293

294



## 295 REFERENCES

- 296
- 297 1 Pardee, K. *et al.* Paper-Based Synthetic Gene Networks. *Cell* **159**, 940-954,  
298 doi:10.1016/j.cell.2014.10.004.
  - 299 2 Pardee, K. *et al.* Rapid, Low-Cost Detection of Zika Virus Using Programmable  
300 Biomolecular Components. *Cell* **165**, 1255-1266, doi:10.1016/j.cell.2016.04.059.
  - 301 3 Ma, D., Shen, L., Wu, K., Diehnelt, C. W. & Green, A. A. Low-cost detection of  
302 norovirus using paper-based cell-free systems and synbody-based viral  
303 enrichment. *Synthetic Biology* **3**, ysy018-ysy018, doi:10.1093/synbio/ysy018  
304 (2018).
  - 305 4 Verosloff, M., Chappell, J., Perry, K. L., Thompson, J. R. & Lucks, J. B. PLANT-  
306 Dx: A Molecular Diagnostic for Point-of-Use Detection of Plant Pathogens. *ACS*  
307 *Synthetic Biology* **8**, 902-905, doi:10.1021/acssynbio.8b00526 (2019).
  - 308 5 Takahashi, M. K. *et al.* A low-cost paper-based synthetic biology platform for  
309 analyzing gut microbiota and host biomarkers. *Nature Communications* **9**, 3347,  
310 doi:10.1038/s41467-018-05864-4 (2018).
  - 311 6 Salehi, A. S. M. *et al.* Cell-Free Protein Synthesis Approach to Biosensing hTR $\beta$ -  
312 Specific Endocrine Disruptors. *Analytical Chemistry* **89**, 3395-3401,  
313 doi:10.1021/acs.analchem.6b04034 (2017).
  - 314 7 Voyvodic, P. L. *et al.* Plug-and-play metabolic transducers expand the chemical  
315 detection space of cell-free biosensors. *Nature Communications* **10**, 1697,  
316 doi:10.1038/s41467-019-09722-9 (2019).
  - 317 8 Alam, K. K. *et al.* Rapid, Low-Cost Detection of Water Contaminants Using  
318 Regulated In Vitro Transcription. *bioRxiv*, 619296, doi:10.1101/619296 (2019).
  - 319 9 Didovyk, A., Tonooka, T., Tsimring, L. & Hasty, J. Rapid and Scalable  
320 Preparation of Bacterial Lysates for Cell-Free Gene Expression. *ACS Synthetic*  
321 *Biology* **6**, 2198-2208, doi:10.1021/acssynbio.7b00253 (2017).
  - 322 10 Carlson, E. D., Gan, R., Hodgman, C. E. & Jewett, M. C. Cell-free protein  
323 synthesis: applications come of age. *Biotechnology advances* **30**, 1185-1194,  
324 doi:10.1016/j.biotechadv.2011.09.016 (2012).
  - 325 11 Gräwe, A. *et al.* A paper-based, cell-free biosensor system for the detection of  
326 heavy metals and date rape drugs. *PLOS ONE* **14**, e0210940,  
327 doi:10.1371/journal.pone.0210940 (2019).
  - 328 12 Karig, D. K., Iyer, S., Simpson, M. L. & Doktycz, M. J. Expression optimization  
329 and synthetic gene networks in cell-free systems. *Nucleic acids research* **40**,  
330 3763-3774, doi:10.1093/nar/gkr1191 (2012).
  - 331 13 Thavarajah, W. *et al.* Point-of-Use Detection of Environmental Fluoride via a Cell-  
332 Free Riboswitch-Based Biosensor. *bioRxiv*, 712844, doi:10.1101/712844 (2019).
  - 333 14 Pandi, A. *et al.* Metabolic perceptrons for neural computing in biological systems.  
334 *Nature Communications* **10**, 3880, doi:10.1038/s41467-019-11889-0 (2019).
  - 335 15 Pandi, A., Grigoras, I., Borkowski, O. & Faulon, J.-L. Optimizing Cell-Free  
336 Biosensors to Monitor Enzymatic Production. *ACS Synthetic Biology* **8**, 1952-  
337 1957, doi:10.1021/acssynbio.9b00160 (2019).
  - 338 16 Larson, S. J., Capel, P. D. & Majewski, M. S. Pesticides in surface waters:  
339 Current understanding of distribution and major influences. Report No. 039-97,  
340 (Reston, VA, 1997).

- 341 17 Wu, M., Quirindongo, M., Sass, J. & Wetzler, A. Still Poisoning the Well: Atrazine  
342 Continues to Contaminate Surface Water and Drinking Water in the United  
343 States. (Natural Resources Defence Council, Online, 2010).
- 344 18 Almborg, K. S. *et al.* Atrazine Contamination of Drinking Water and Adverse Birth  
345 Outcomes in Community Water Systems with Elevated Atrazine in Ohio,  
346 2006~2008. *Int J Environ Res Public Health* **15**, 1889,  
347 doi:10.3390/ijerph15091889 (2018).
- 348 19 Naldenko, O. in *EWG News and Analysis* (Environmental Working Group,  
349 Online, 2017).
- 350 20 Liu, X. *et al.* Design of a transcriptional biosensor for the portable, on-demand  
351 detection of cyanuric acid. *bioRxiv*, 736355, doi:10.1101/736355 (2019).
- 352 21 Platero, A. I., García-Jaramillo, M., Santero, E. & Govantes, F. Transcriptional  
353 organization and regulatory elements of a *Pseudomonas* sp. strain ADP operon  
354 encoding a LysR-type regulator and a putative solute transport system. *Journal*  
355 *of bacteriology* **194**, 6560-6573, doi:10.1128/JB.01348-12 (2012).
- 356 22 de Souza, M. L., Seffernick, J., Martinez, B., Sadowsky, M. J. & Wackett, L. P.  
357 The Atrazine Catabolism Genes *atzABC* Are Widespread and Highly  
358 Conserved. *Journal of Bacteriology* **180**, 1951-1954 (1998).
- 359 23 Dudley, Q. M., Anderson, K. C. & Jewett, M. C. Cell-Free Mixing of *Escherichia*  
360 *coli* Crude Extracts to Prototype and Rationally Engineer High-Titer Mevalonate  
361 Synthesis. *ACS Synthetic Biology* **5**, 1578-1588, doi:10.1021/acssynbio.6b00154  
362 (2016).
- 363 24 Silverman, A. D., Kelley-Loughnane, N., Lucks, J. B. & Jewett, M. C.  
364 Deconstructing Cell-Free Extract Preparation for in Vitro Activation of  
365 Transcriptional Genetic Circuitry. *ACS Synthetic Biology* **8**, 403-414,  
366 doi:10.1021/acssynbio.8b00430 (2019).
- 367 25 Seffernick, J. L., de Souza, M. L., Sadowsky, M. J. & Wackett, L. P. Melamine  
368 deaminase and atrazine chlorohydrolase: 98 percent identical but functionally  
369 different. *Journal of bacteriology* **183**, 2405-2410, doi:10.1128/JB.183.8.2405-  
370 2410.2001 (2001).
- 371 26 Seffernick, J. L., Johnson, G., Sadowsky, M. J. & Wackett, L. P. Substrate  
372 Specificity of Atrazine Chlorohydrolase and Atrazine-Catabolizing Bacteria.  
373 *Applied and Environmental Microbiology* **66**, 4247-4252,  
374 doi:10.1128/aem.66.10.4247-4252.2000 (2000).
- 375 27 Takahashi, M. K. *et al.* Rapidly characterizing the fast dynamics of RNA genetic  
376 circuitry with cell-free transcription-translation (TX-TL) systems. *ACS synthetic*  
377 *biology* **4**, 503-515, doi:10.1021/sb400206c (2015).
- 378 28 Hua, A., Gueuné, H., Cregut, M., Thouand, G. & Durand, M.-J. Development of a  
379 bacterial bioassay for atrazine and cyanuric acid detection. *Frontiers in*  
380 *microbiology* **6**, 211-211, doi:10.3389/fmicb.2015.00211 (2015).
- 381 29 Scott, C. *et al.* Catalytic Improvement and Evolution of Atrazine Chlorohydrolase.  
382 *Applied and Environmental Microbiology* **75**, 2184-2191, doi:10.1128/aem.02634-  
383 08 (2009).
- 384 30 Wen, K. Y. *et al.* A Cell-Free Biosensor for Detecting Quorum Sensing Molecules  
385 in *P. aeruginosa*-Infected Respiratory Samples. *ACS Synthetic Biology* **6**, 2293-  
386 2301, doi:10.1021/acssynbio.7b00219 (2017).

- 387 31 Pellinen, T., Huovinen, T. & Karp, M. A cell-free biosensor for the detection of  
388 transcriptional inducers using firefly luciferase as a reporter. *Analytical*  
389 *Biochemistry* **330**, 52-57, doi:<https://doi.org/10.1016/j.ab.2004.03.064> (2004).  
390 32 Siegal-Gaskins, D., Tuza, Z. A., Kim, J., Noireaux, V. & Murray, R. M. Gene  
391 Circuit Performance Characterization and Resource Usage in a Cell-Free  
392 “Breadboard”. *ACS Synthetic Biology* **3**, 416-425, doi:10.1021/sb400203p (2014).  
393
